# Supplementary material
Source: PubMed Central journal article supplement (PMC2577265)
Supplement: pp.108.121939_1.pdf [file pp.108.121939_1.pdf]

|        | CSLD1 | CSLD2 | CSLD3 | CSLD4 | CSLD5 | CSLD6 |                      |
|--------|-------|-------|-------|-------|-------|-------|----------------------|
| 90     | 3184  | 2232  | 249   | 1255  | 13    |       | ➤ callus             |
| 94     | 2760  | 2506  | 301   | 1438  | 11    |       | ➤ cell suspension    |
| 63     | 1793  | 1988  | 262   | 1374  | 13    |       | ➤ seedling           |
| 63     | 1135  | 944   | 340   | 1368  | 16    |       | • cotyledons         |
| 69     | 1438  | 2196  | 233   | 4300  | 15    |       | • hypocotyl          |
| 104    | 2719  | 2850  | 264   | 1865  | 17    |       | • radicle            |
| 853    | 1287  | 1185  | 513   | 3093  | 35    |       | ➤ inflorescence      |
| 2806   | 1102  | 1052  | 1265  | 2482  | 84    |       | • flower             |
| 141    | 1047  | 1130  | 169   | 1871  | 17    |       | • carpel             |
| 75     | 666   | 869   | 118   | 1231  | 8     |       | • ovary              |
| 69     | 647   | 1347  | 134   | 383   | 8     |       | • stigma             |
| 290    | 1346  | 1083  | 285   | 309   | 8     |       | • petal              |
| 268    | 2024  | 844   | 323   | 220   | 9     |       | • sepal              |
| 20472  | 615   | 519   | 7596  | 854   | 105   |       | • stamen             |
| 105229 | 569   | 518   | 31852 | 301   | 38    |       | • pollen             |
| 108    | 727   | 917   | 212   | 1502  | 15    |       | • pedicel            |
| 280    | 1512  | 1144  | 322   | 1500  | 19    |       | • silique            |
| 83     | 1789  | 1262  | 209   | 684   | 13    |       | • seed               |
| 110    | 1161  | 1531  | 293   | 1675  | 21    |       | • stem               |
| 19     | 1050  | 1700  | 158   | 1400  | 8     |       | • node               |
| 62     | 1222  | 1204  | 139   | 7212  | 7     |       | • shoot apex         |
| 59     | 1931  | 964   | 238   | 262   | 21    |       | • cauline leaf       |
| 73     | 1578  | 1107  | 272   | 903   | 15    |       | ➤ rosette            |
| 66     | 1159  | 1104  | 263   | 2104  | 13    |       | • juvenile leaf      |
| 73     | 2286  | 1282  | 291   | 435   | 15    |       | • adult leaf         |
| 94     | 993   | 981   | 234   | 959   | 11    |       | • petiole            |
| 100    | 2278  | 763   | 243   | 114   | 7     |       | • senescent leaf     |
| 94     | 2375  | 1549  | 142   | 386   | 11    |       | • hypocotyl          |
| 91     | 2106  | 1241  | 202   | 305   | 10    |       | • xylem              |
| 86     | 1857  | 1292  | 137   | 521   | 11    |       | • cork               |
| 82     | 3563  | 3324  | 250   | 1215  | 12    |       | ➤ roots              |
| 108    | 4184  | 4824  | 267   | 1164  | 15    |       | • lateral root       |
| 146    | 1962  | 1611  | 224   | 2629  | 11    |       | • root tip           |
| 80     | 4645  | 5136  | 235   | 1213  | 13    |       | • elongation zone    |
| 108    | 8086  | 5357  | 165   | 550   | 19    |       | • root hair zone     |
| 220    | 5776  | 8036  | 332   | 743   | 32    |       | • endodermis         |
| 162    | 3869  | 5819  | 141   | 1563  | 13    |       | • endodermis+cortex  |
| 388    | 2269  | 4937  | 194   | 1707  | 10    |       | • epid. trichoblasts |
| 198    | 5278  | 10071 | 126   | 1913  | 16    |       | • lateral root cap   |
| 230    | 2991  | 5170  | 76    | 1032  | 15    |       | ➤ 60 stele           |

**Supplemental Figure 1. *In silico* Expression Profiling of the CSLD family.** The relative expression of *CSLD* genes in all major Arabidopsis organs/tissues was analyzed using the Genvestigator Meta-Analyzer tool (<https://www.genevestigator.ethz.ch/>). Signal intensity values are arbitrary units.

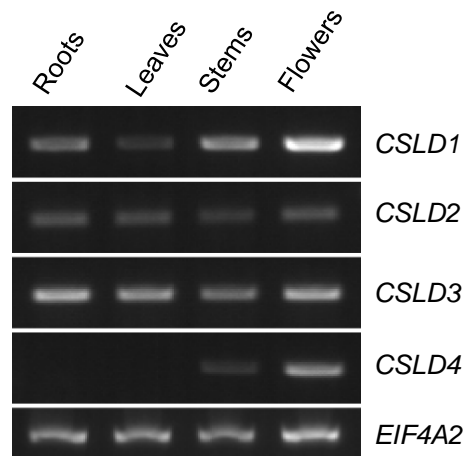

**Supplemental Figure 2.** RT-PCR analysis of the CSLD family. RT-PCR analysis was carried out on various organs of wild type (Col-0) plants using primers specific for each of the members of the CSLD family. Arabidopsis translation initiation factor EIF4A2 was used as a constitutive expression control.

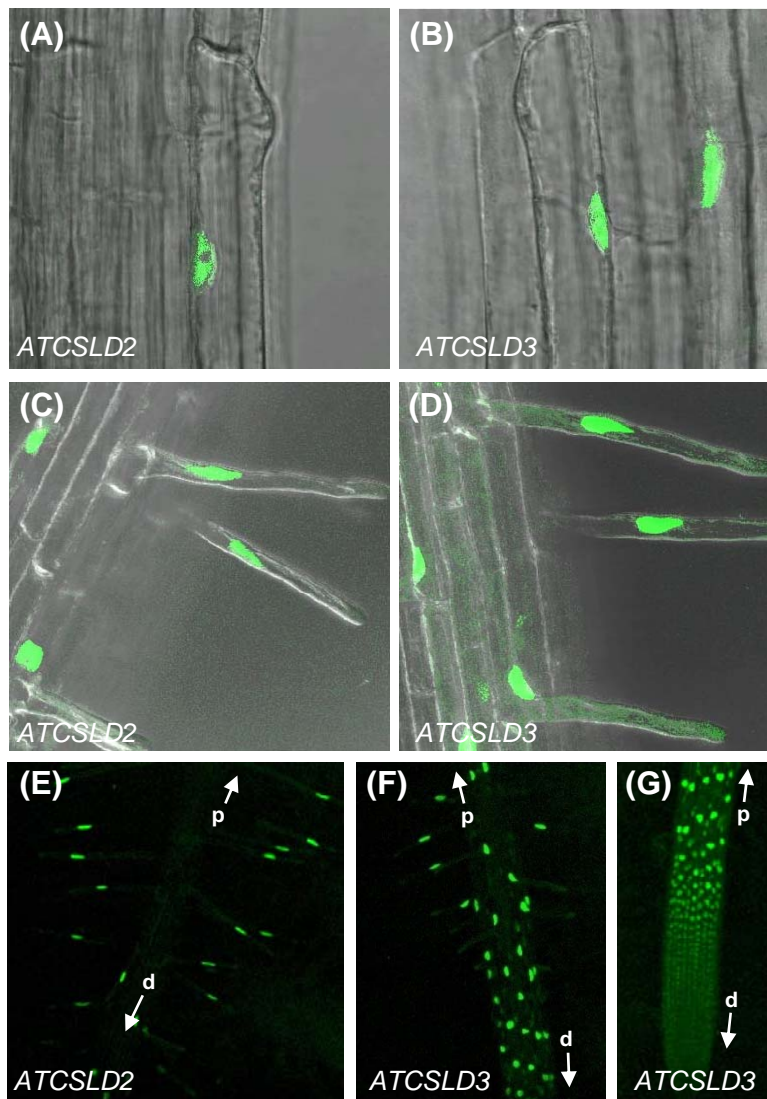

**Supplemental Figure 3.** Analysis of promoter activity for CSLD2 and CSLD3. Confocal microscopic analysis of GFP expression in roots of 6 day old wild type seedlings carrying proCSLD2::GFP::GUS or proCSLD3::GFP::GUS fusion constructs. Expression of constructs was observed in some trichoblasts at early (A and B) and late (C and D) stages of root hair development. proCSLD2::GFP::GUS expression was generally sparse in the distal (d) portion of roots and stronger in proximal (p) portions (E). In contrast, proCSLD3::GFP::GUS expression was strong in distal portions (F and G).

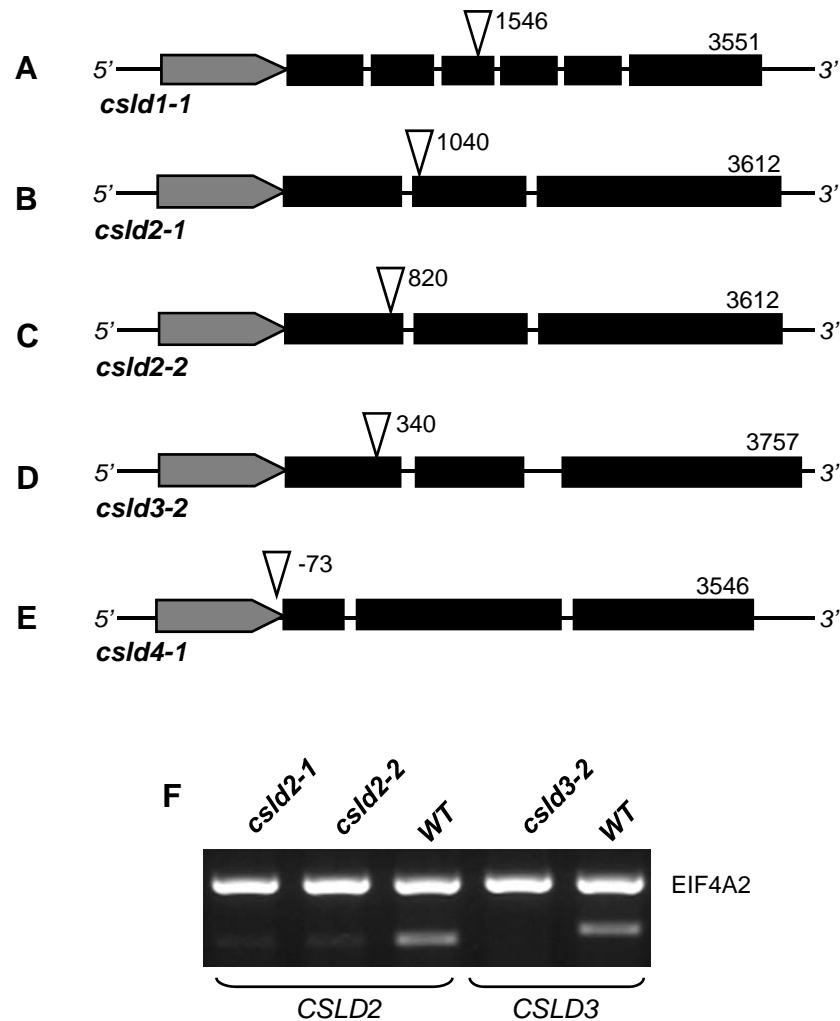

**Supplemental Figure 4.** Generation of *CSLD* Knockout Lines. Schematic showing the gene structures of *CSLD1* (A), *CSLD2* (B and C) *CSLD3* (D) and *CSLD4* (E). Promoter regions are represented by grey boxes, black boxes are exons and connecting lines are introns. Insertional mutants were generated and the position of the T-DNA insertion in each gene is indicated by open triangles. *csld2-1*, *csld2-2*, and *csld3-2* are homozygous mutants whereas *csld1-1* and *csld4-1* are heterozygous. (F), Semi-quantitative RT-PCR of *CSLD2* and *CSLD3* in wild-type (WT), *csld2-1*, *csld2-2* and *csld3-2*. Total RNA was prepared from root tissue. *EIF4A2* primers were used as a control. Products obtained from primers for *CSLD2* and *CSLD3* are indicated at the bottom.

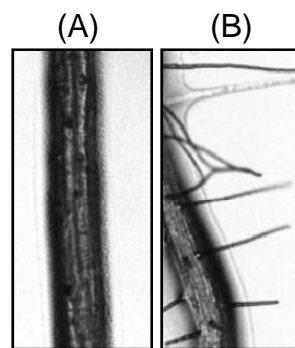

**Supplemental Figure 5.** Functional complementation of *csld3-2* with YFP-CSLD3. Phenotypes of the *csld3-2* mutant (A) and *csld3-2* complemented with the 35S::YFP::CSLD3 construct used in Figure 10 (B).
