# Supplementary material
Source: PubMed Central journal article supplement (PMC2577265)
Supplement: pp.108.121939_2.pdf [file pp.108.121939_2.pdf]

## SUPPLEMENTAL DATA

**Supplemental Figure 1.** *In silico*, expression profiling of the *CSLD* family.

**Supplemental Figure 2.** RT-PCR analysis of the *CSLD* family.

**Supplemental Figure 3.** Analysis of promoter activity for *CSLD2* and *CSLD3*

**Supplemental Figure 4.** Generation of *CSLD* knockout lines.

**Supplemental Figure 5.** Functional Complementation of *csl3-2* with YFP-*CSLD3*

**Supplemental Movie 1.** Time lapse microscopy of living *csl2-1* root hairs.

**Supplemental Movie 2.** Time lapse microscopy of living *csl2-1* root hairs.

**Supplemental Movie 3.** Time lapse microscopy of living *csl2-1* root hairs.

**Supplemental Movie 4.** Time lapse microscopy of living r *csl3-2* root hairs.

**Supplemental Movie 5.** Time lapse microscopy of living r *csl3-2* root hairs.
